# Supplementary material for: Breaking bonds with electrons: stepwise and concerted reductive cleavage of C–S, C–Se and Se–CN bonds in phenacylthiocyanates and phenacylselenocyanates
Source: Royal Society of Chemistry journal article supplement (doi:10.1039/c4ra16154h), 2014-12-22
Supplement: c4ra16154h1.pdf [file c4ra16154h1.pdf]

# Supporting Information

## Breaking bonds with electrons: stepwise and concerted cleavage of C-S, C-Se and Se-CN bonds in phenacylthiocyanates and phenacylselenocyanates

Lydia M. Bouchet,<sup>[a]</sup> Alicia B. Peñeñory,<sup>[a]</sup> Marc Robert<sup>\*[b]</sup> and Juan E. Argüello<sup>\*[a]</sup>

|                                                                                                                                                     |           |
|-----------------------------------------------------------------------------------------------------------------------------------------------------|-----------|
| Electrochemical characteristics of phenacylthiocyanates (1b-e)                                                                                      | 3         |
| Electrochemical characteristics of phenacylselenocyanates (2b-e)                                                                                    | 4         |
| Electrochemical characteristics of 4a and 5a                                                                                                        | 5         |
| <sup>1</sup> H NMR. 4-Cyanophenacyl thiocyanate (1d)                                                                                                | 6         |
| <sup>13</sup> C NMR. 4-Cyanophenacyl thiocyanate (1d)                                                                                               | 6         |
| <sup>1</sup> H NMR. 4-Cyanophenacyl selenocyanate (2d)                                                                                              | 7         |
| <sup>77</sup> Se NMR. 4-Cyanophenacyl selenocyanate (2d)                                                                                            | 8         |
| <b>COMPUTATIONAL CALCULATIONS</b>                                                                                                                   | <b>8</b>  |
| LUMOs for neutral compounds 1 and 2 (in DMF)                                                                                                        | 8         |
| Optimized geometries for one electron reduced compounds 1 and 2.                                                                                    | 10        |
| Table S1: LUMO coefficient for neutral 1a-e and 2a-e, and C-X (X = S, Se) bond distance in 1a-e and 2a-e after one electron reduction. <sup>a</sup> | 10        |
| <b>Z-MATRIX FOR OPTIMIZED GEOMETRIES</b>                                                                                                            | <b>11</b> |
| Phenacylthiocyanate (1a) in gas phase                                                                                                               | 11        |
| <i>p</i> -Methylphenacylthiocyanate (1b) in gas phase                                                                                               | 11        |
| <i>p</i> -Methoxyphenacylthiocyanate (1c) in gas phase                                                                                              | 12        |
| Thiocyanate radical ( <sup>•</sup> SCN) in gas phase                                                                                                | 12        |
| C <sub>6</sub> H <sub>4</sub> COCH <sub>2</sub> <sup>•</sup> in gas phase                                                                           | 12        |
| CH <sub>3</sub> C <sub>6</sub> H <sub>4</sub> COCH <sub>2</sub> <sup>•</sup> in gas phase                                                           | 13        |
| CH <sub>3</sub> OC <sub>6</sub> H <sub>4</sub> COCH <sub>2</sub> <sup>•</sup> in gas phase                                                          | 13        |

|                                                                      |    |
|----------------------------------------------------------------------|----|
| Phenacylselenocyanate (2a) in gas phase                              | 14 |
| $C_6H_4COCH_2Se^*$ in gas phase                                      | 14 |
| Selenocyanate radical ( $^*SeCN$ ) in gas phase                      | 15 |
| Cyano radical ( $^*CN$ ) in gas phase                                | 15 |
| Phenacylthiocyanate (1a) in DMF                                      | 15 |
| <i>p</i> -Methylphenacylthiocyanate (1b) in DMF                      | 15 |
| <i>p</i> -Methoxyphenacylthiocyanate (1c) in DMF                     | 16 |
| <i>p</i> -Cyanophenacylthiocyanate (1d) in DMF                       | 16 |
| <i>p</i> -Nitrophenacylthiocyanate (1e) in DMF                       | 17 |
| Phenacylselenocyanate (2a) in DMF                                    | 17 |
| <i>p</i> -Methylphenacylselenocyanate (2b) in DMF                    | 18 |
| <i>p</i> -Methoxyphenacylselenocyanate (2c) in DMF                   | 18 |
| <i>p</i> -Cyanophenacylselenocyanate (2d) in DMF                     | 19 |
| <i>p</i> -Nitrophenacylselenocyanate (2e) in DMF                     | 19 |
| Reduced phenacylthiocyanate ( $1a + e^-$ ) in DMF                    | 20 |
| Reduced <i>p</i> -methylphenacylthiocyanate ( $1b + e^-$ ) in DMF    | 20 |
| Reduced <i>p</i> -methoxyphenacylthiocyanate ( $1c + e^-$ ) in DMF   | 21 |
| Reduced <i>p</i> -cyanophenacylthiocyanate ( $1d^{*-}$ ) in DMF      | 21 |
| Reduced <i>p</i> -nitrophenacylthiocyanate ( $1e^{*-}$ ) in DMF      | 22 |
| Reduced phenacylselenocyanate ( $2a + e^-$ ) in DMF                  | 22 |
| Reduced <i>p</i> -methylphenacylselenocyanate ( $2b + e^-$ ) in DMF  | 23 |
| Reduced <i>p</i> -methoxyphenacylselenocyanate ( $2c + e^-$ ) in DMF | 23 |
| Reduced <i>p</i> -cyanophenacylselenocyanate ( $2d^{*-}$ ) in DMF    | 24 |
| Reduced <i>p</i> -nitrophenacylselenocyanate ( $2e^{*-}$ ) in DMF    | 24 |

## Electrochemical characteristics of phenacylthiocyanates (1b-e)

### a- Cyclic voltammetry

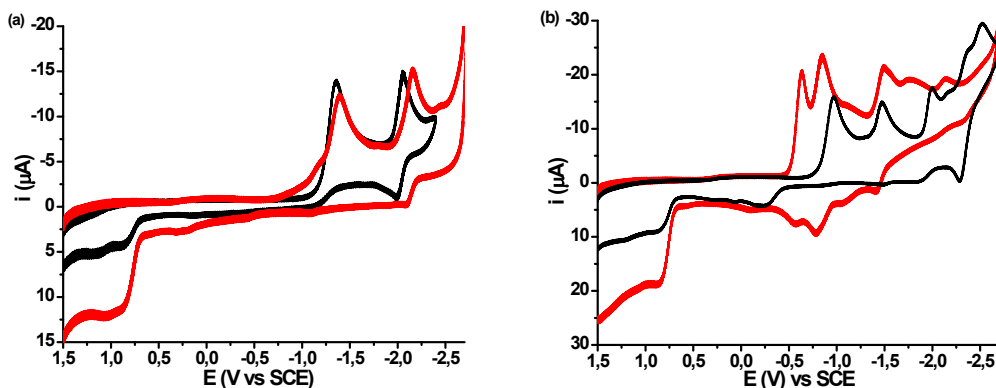

**Figure S1.** CVs of (a) **1b** (–) and **1c** (–); (b) **1d** (–) and **1e** (–)  $C = 1\text{mM}$ , in DMF/TBAF (0.1M) at a glassy carbon electrode,  $\nu = 0.1\text{Vs}^{-1}$ .

### b- Variation of peak potential $E_p$ with $\log \nu$ , 1<sup>st</sup> reduction wave

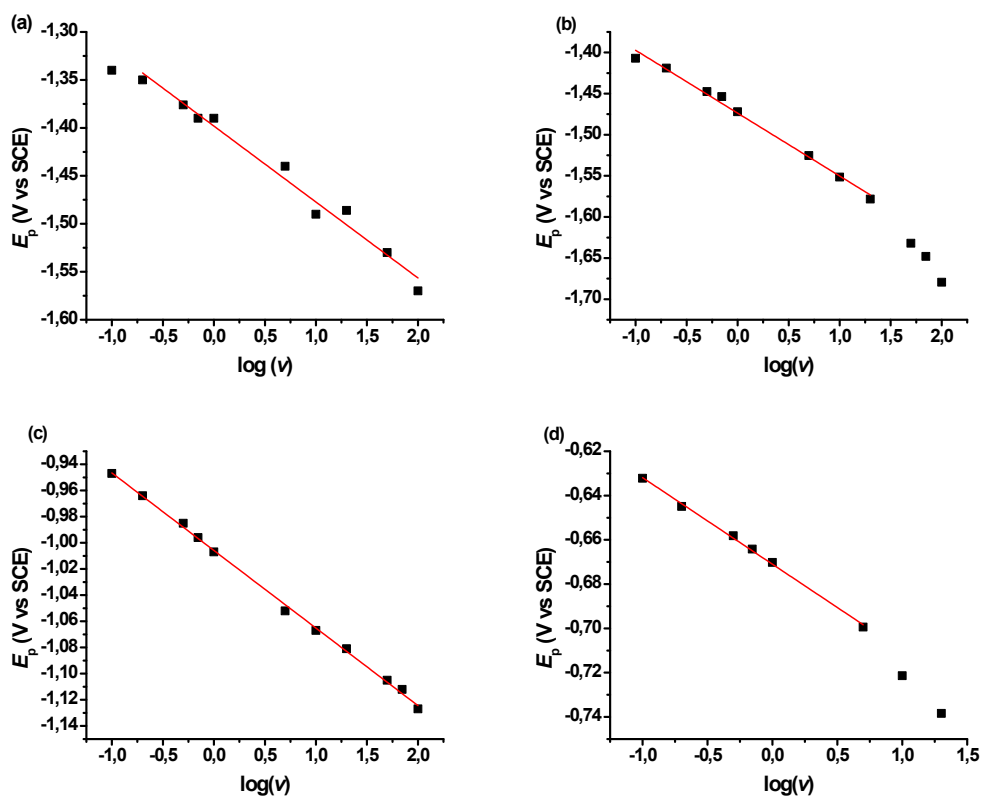

**Figure S2.**  $E_p$  vs  $\log \nu$  for (a) **1b**; (b) **1c**; (c) **1d** and (d) **1e**, in DMF/TBAF (0.1M) at a glassy carbon electrode,  $C_{\text{substrate}} = 1\text{mM}$ .

## Electrochemical characteristics of phenacylselenocyanates (2b-e)

### a- Cyclic voltammetry

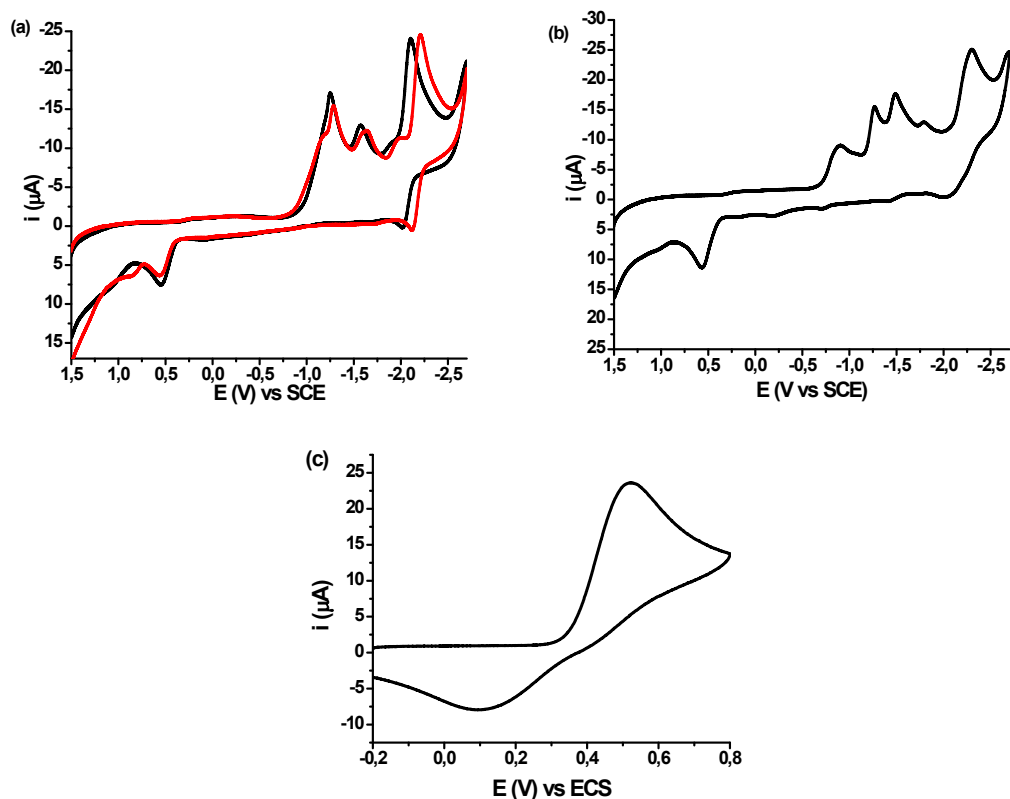

**Figure S3.** CVs of (a) 2b (–) and 2c (–); (b) 2d (–); (c) KSeCN, in DMF/TBAF (0.1M) at a glassy carbon electrode,  $\nu = 0.1 \text{ V s}^{-1}$ ,  $C_{\text{substrate}} = 1 \text{ mM}$ .

### b- Variation of peak potential $E_p$ with $\log \nu$ , 1<sup>st</sup> reduction wave

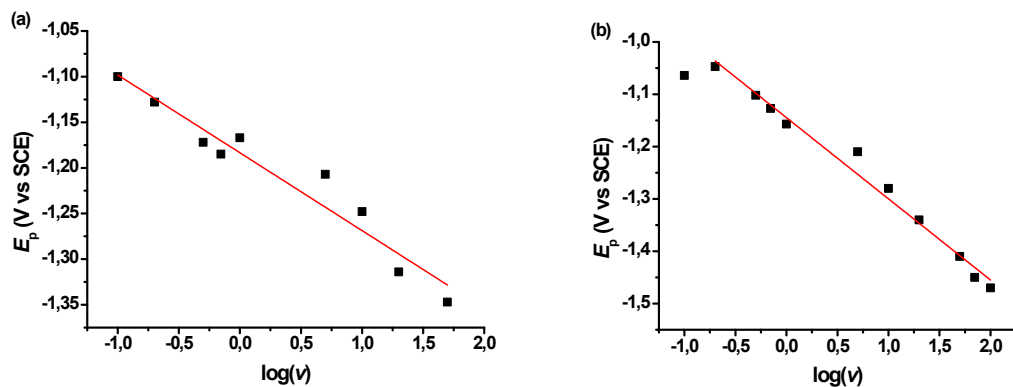

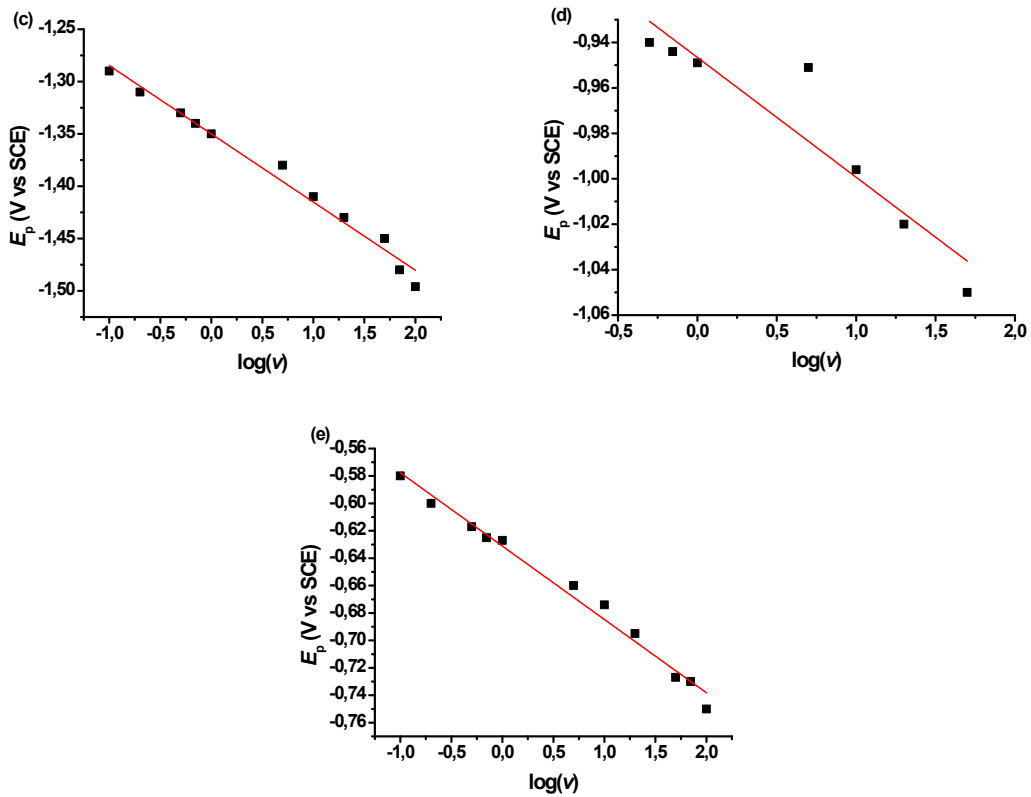

**Figure S4.**  $E_p$  vs  $\log v$  for (a) **2a**; (b) **2b**; (c) **2c**; (d) **2d** and (e) **2e** in DMF/TBAF (0.1M) at a glassy carbon electrode,  $C_{\text{substrate}} = 1\text{mM}$ .

#### Electrochemical characteristics of **4a** and **5a**

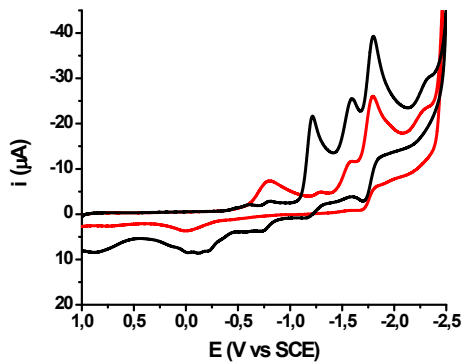

**Figure S5.** CVs of **4a** (–) and **5a** (–), in DMF/TBAF (0.1M) at a glassy carbon electrode,  $v = 0.1\text{Vs}^{-1}$ ,  $C_{\text{substrate}} = 1\text{mM}$ .

**<sup>1</sup>H NMR. 4-Cyanophenacyl thiocyanate (1d)**

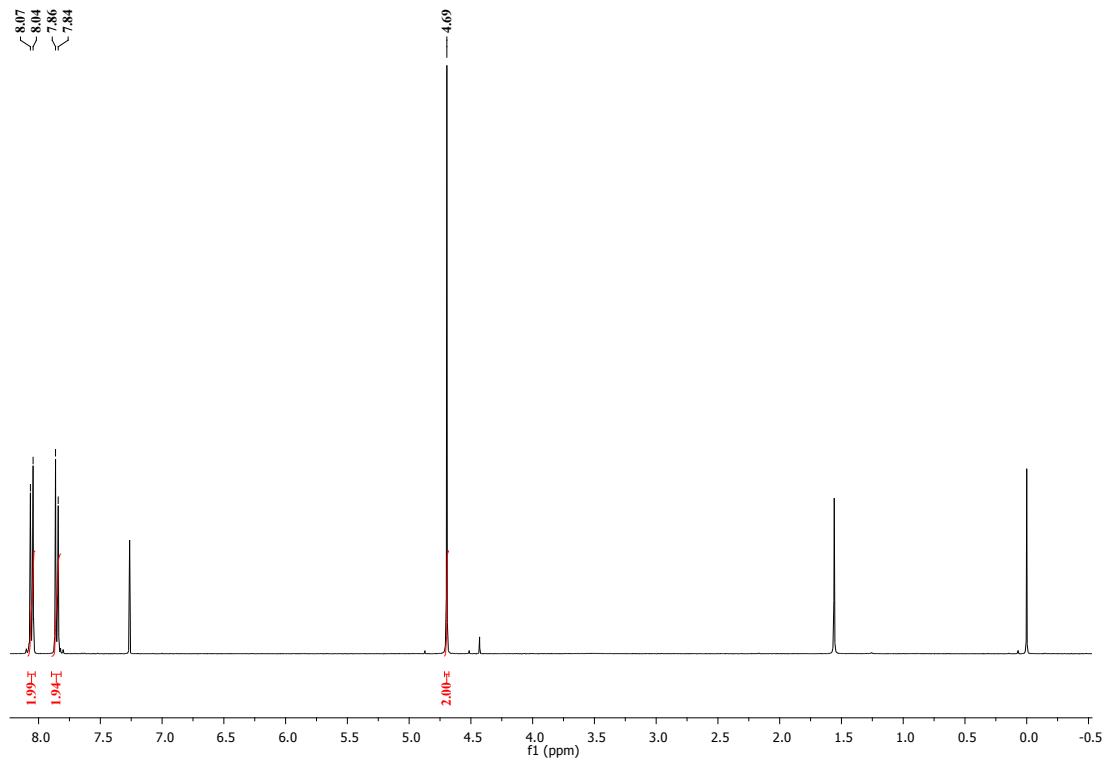

**<sup>13</sup>C NMR. 4-Cyanophenacyl thiocyanate (1d)**

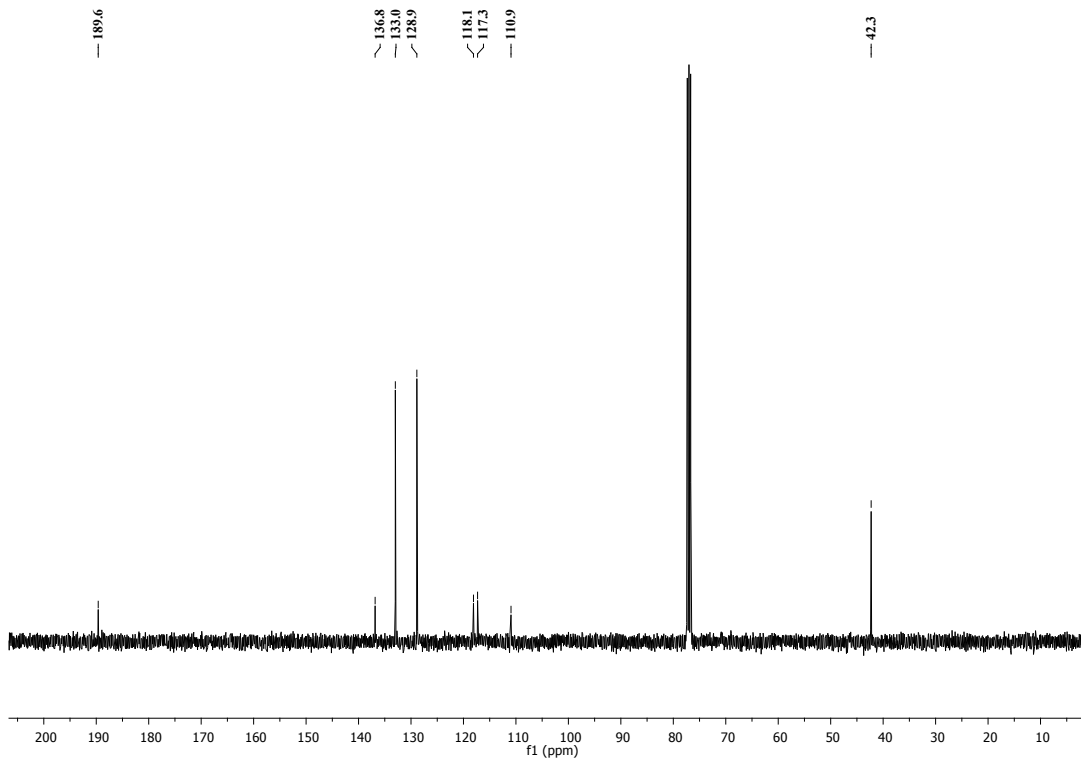

### <sup>1</sup>H NMR. 4-Cyanophenacyl selenocyanate (2d)

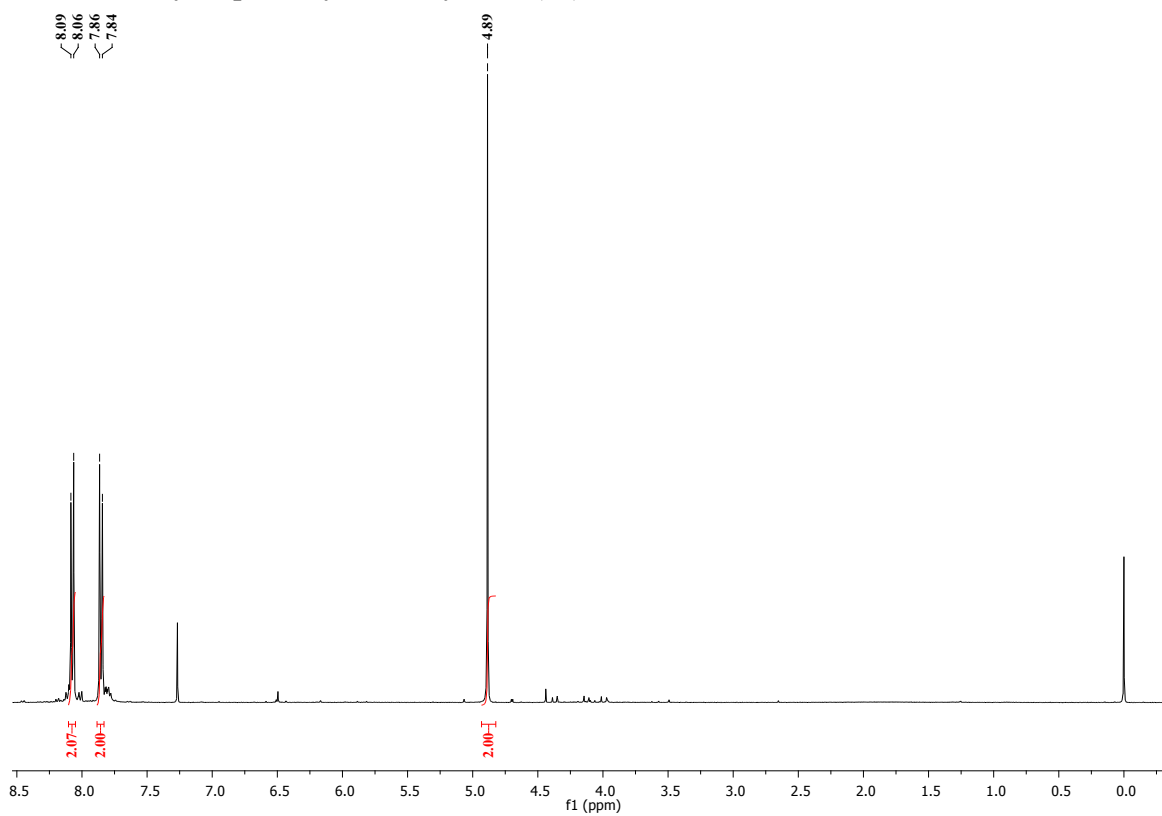

### <sup>13</sup>C NMR. 4-Cyanophenacyl selenocyanate (2d)

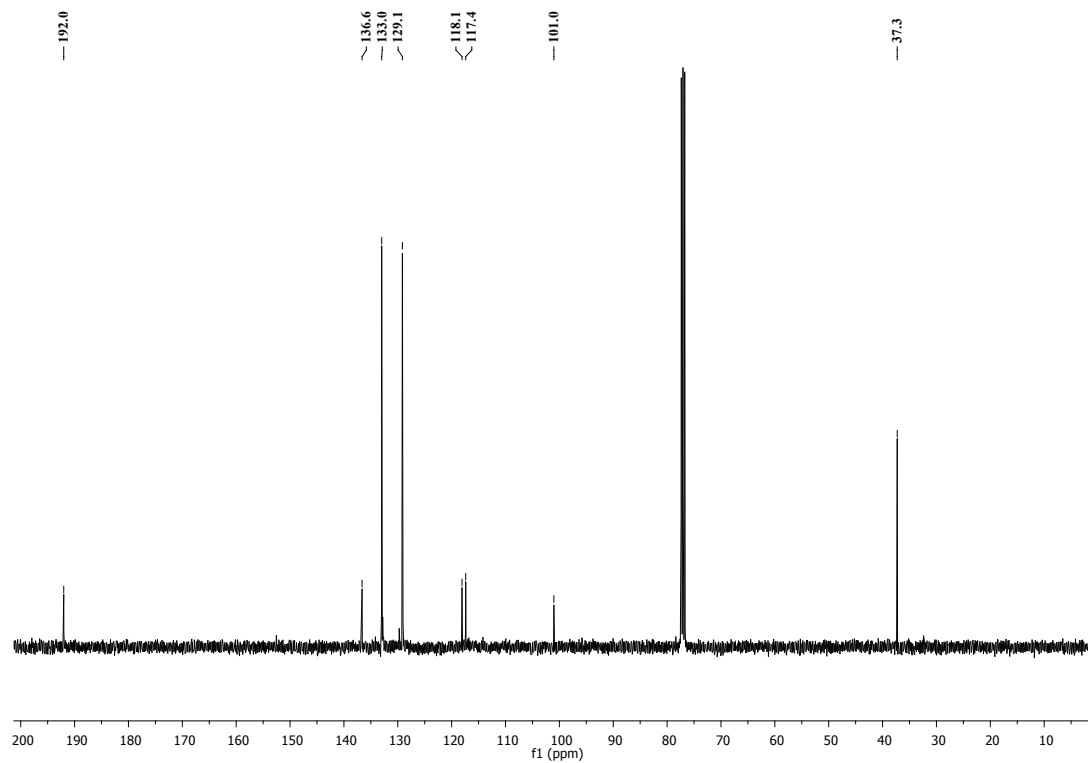

## $^{77}\text{Se}$ NMR. 4-Cyanophenacyl selenocyanate (2d)

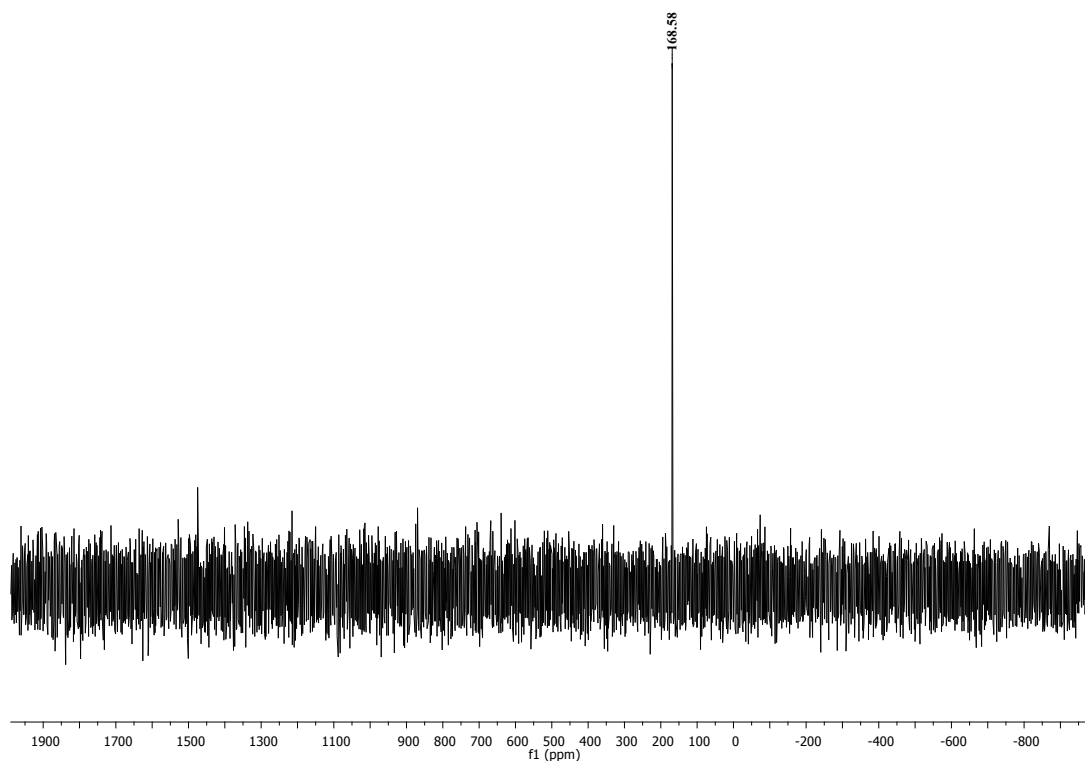

### Computational calculations

The calculations were performed using the Gaussian 09 package.<sup>1</sup> Optimizations were carried out using DFT at the B3LYP/6-31+G(d,p) and B3LYP/6-311+G(d,p) level for the sulphur and selenium atoms. We checked that the conformations obtained were minima by running frequency calculations. No imaginary vibrational frequencies were found. All energy values include zero point correction. LUMO calculation, geometries for one electron reduced compounds were calculated in DMF by using the PCM model.

### LUMOs for neutral compounds 1 and 2 (in DMF)

a

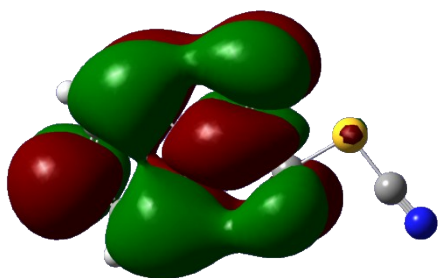

b

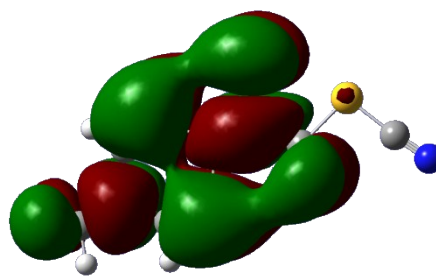



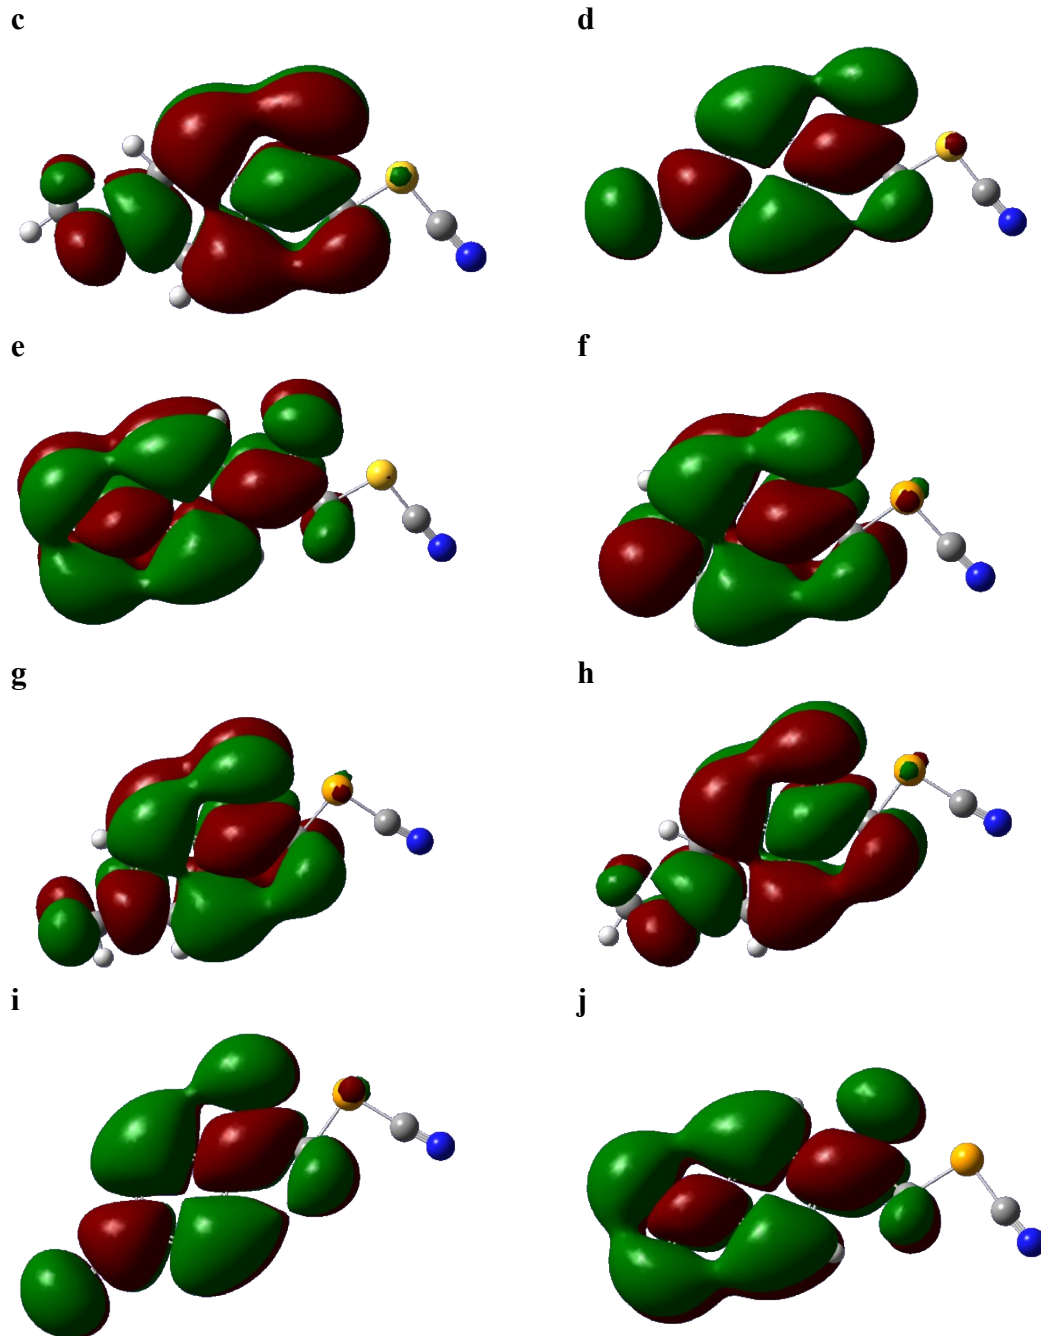

**Figure S6.** LUMOs of (a) 1a; (b) 1b; (c) 1c; (d) 1d; (e) 1e; (f) 2a; (g) 2b; (h) 2c; (i) 2d and (j) 2e.

Optimized geometries for one electron reduced compounds 1 and 2.

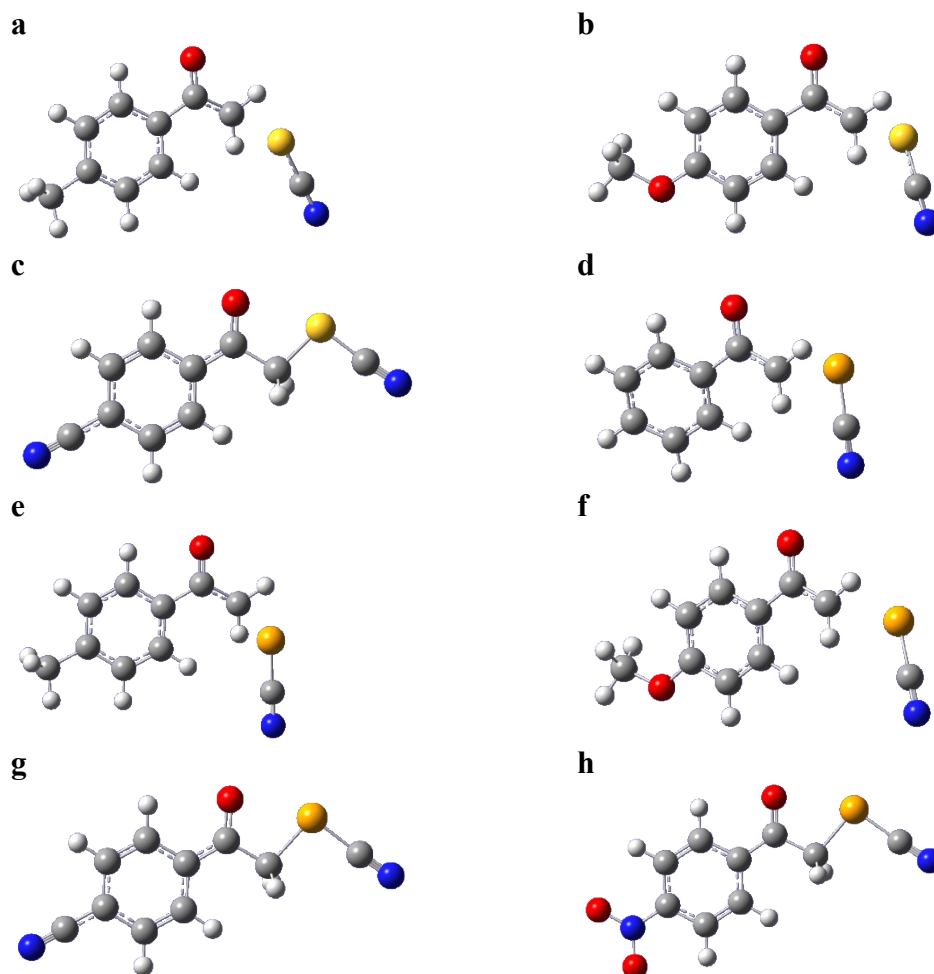

Figure S7. Optimized structures for (a) **1b** + e<sup>-</sup>; (b) **1c** + e<sup>-</sup>; (c) **1d**<sup>•-</sup>; (d) **2a** + e<sup>-</sup>; (e) **2b** + e<sup>-</sup>; (f) **2c** + e<sup>-</sup>; (g) **2d**<sup>•-</sup>; (h) **2e**<sup>•-</sup>

Table S1: LUMO coefficient for neutral 1a-e and 2a-e, and C-X (X = S, Se) bond distance in 1a-e and 2a-e after one electron reduction.<sup>a</sup>

| Compound  | LUMO coefficient for neutral molecule | Distance CH <sub>2</sub> -X (X= S or Se) in • <sup>-</sup> (Å) |
|-----------|---------------------------------------|----------------------------------------------------------------|
| <b>1a</b> | C(H <sub>2</sub> ) = 0.40 ; S = 0.61  | 3.15                                                           |
| <b>1b</b> | C(H <sub>2</sub> ) = 0.23 ; S = 0.58  | 3.22                                                           |
| <b>1c</b> | C(H <sub>2</sub> ) = 0.19 ; S = 0.60  | 3.38                                                           |
| <b>1d</b> | C(H <sub>2</sub> ) = 0.25 ; S = 0.51  | 1.85                                                           |
| <b>1e</b> | C(H <sub>2</sub> ) = 0 ; S = 0        | 1.85                                                           |
| <b>2a</b> | C(H <sub>2</sub> ) = 0.15 ; Se = 0.40 | 3.07                                                           |
| <b>2b</b> | C(H <sub>2</sub> ) = 0.17 ; Se = 0.41 | 3.12                                                           |
| <b>2c</b> | C(H <sub>2</sub> ) = 0.16 ; Se = 0.40 | 3.17                                                           |
| <b>2d</b> | C(H <sub>2</sub> ) = 0.20 ; Se = 0.41 | 1.99                                                           |
| <b>2e</b> | C(H <sub>2</sub> ) = 0 ; Se = 0       | 1.99                                                           |

<sup>a</sup> Calculations performed with B3LYP/6-311+G(p,d) (in DMF).

## Z-Matrix for optimized geometries

### Phenacylthiocyanate (1a) in gas phase

Energy:-875.345193 a.u. ZPVC:0.138300 a.u. Total energy: -875.206893 a.u.

| Center Number | Atomic Number | X            | Y            | Z            |
|---------------|---------------|--------------|--------------|--------------|
| 1             | 6             | 0.000013589  | -0.000008852 | 0.000014531  |
| 2             | 6             | -0.000022330 | -0.000008302 | -0.000014528 |
| 3             | 6             | 0.000005621  | 0.000036529  | -0.000001463 |
| 4             | 6             | 0.000010327  | 0.000017078  | 0.000011375  |
| 5             | 6             | -0.000007526 | 0.000006839  | -0.000005067 |
| 6             | 1             | 0.000000590  | -0.000002620 | 0.000005057  |
| 7             | 1             | -0.000000254 | -0.000002718 | 0.000001819  |
| 8             | 1             | -0.000002065 | -0.000005575 | 0.000000471  |
| 9             | 1             | -0.000002088 | -0.000009155 | -0.000000216 |
| 10            | 1             | 0.000000595  | -0.000003551 | 0.000004990  |
| 11            | 6             | 0.000015952  | -0.000009657 | -0.000000159 |
| 12            | 6             | 0.000000888  | -0.000017937 | 0.000007629  |
| 13            | 6             | 0.000017957  | -0.000000095 | 0.000023484  |
| 14            | 1             | -0.000007154 | 0.000000225  | -0.000009149 |
| 15            | 1             | -0.000007593 | -0.000003010 | -0.000007397 |
| 16            | 8             | -0.000010955 | 0.000016844  | -0.000013625 |
| 17            | 16            | 0.000026181  | -0.000006778 | 0.000016002  |
| 18            | 6             | -0.000048162 | -0.000010748 | -0.000039519 |
| 19            | 7             | 0.000016424  | 0.000011483  | 0.000005763  |

### *p*-Methylphenacylthiocyanate (1b) in gas phase

Energy:-914.664280 a.u. ZPVC:0.165673 a.u. Total energy: -914.4986069 a.u.

| Center Number | Atomic Number | X            | Y            | Z            |
|---------------|---------------|--------------|--------------|--------------|
| 1             | 6             | 0.000012581  | -0.000001601 | 0.000011053  |
| 2             | 6             | -0.000018807 | -0.000009464 | -0.000013930 |
| 3             | 6             | 0.000002772  | 0.000042056  | -0.000003888 |
| 4             | 6             | 0.000007816  | 0.000018741  | 0.000005520  |
| 5             | 6             | -0.000007433 | 0.000005321  | -0.000002906 |
| 6             | 1             | -0.000000461 | -0.000001555 | 0.000001367  |
| 7             | 1             | -0.000000672 | -0.000006176 | 0.000000442  |
| 8             | 1             | 0.000000310  | -0.000005771 | 0.000000472  |
| 9             | 1             | 0.000000303  | -0.000002794 | 0.000003156  |
| 10            | 6             | -0.000005605 | 0.000074755  | -0.000016466 |
| 11            | 6             | 0.000007495  | -0.000060898 | 0.000013948  |
| 12            | 6             | 0.000020368  | 0.000011081  | 0.000012796  |
| 13            | 1             | -0.000006458 | -0.000004318 | -0.000007801 |
| 14            | 1             | -0.000009080 | -0.000005974 | -0.000006000 |
| 15            | 8             | 0.000011932  | -0.000027701 | 0.000009859  |
| 16            | 16            | 0.000013766  | -0.000017518 | 0.000004142  |
| 17            | 6             | -0.000031763 | -0.000011887 | -0.000022015 |
| 18            | 7             | 0.000008669  | 0.000009021  | -0.000000331 |
| 19            | 6             | 0.000001100  | -0.000010419 | 0.000007047  |
| 20            | 1             | -0.000002960 | 0.000003199  | 0.000002116  |
| 21            | 1             | -0.000002573 | 0.000001744  | 0.000000111  |
| 22            | 1             | -0.000001302 | 0.000000160  | 0.000001308  |

**p-Methoxyphenacylthiocyanate (1c) in gas phase**

Energy:-989.8734602a.u. ZPVC:0.170927 a.u. Total energy:-989.7025332a.u.

| Center<br>Number | Atomic<br>Number | X            | Y            | Z            |
|------------------|------------------|--------------|--------------|--------------|
| 1                | 6                | 0.000014330  | 0.000021485  | 0.000003899  |
| 2                | 6                | -0.000001425 | -0.000006245 | -0.000005921 |
| 3                | 6                | 0.000001395  | 0.000002194  | -0.000001776 |
| 4                | 6                | -0.000003313 | -0.000001621 | 0.000002081  |
| 5                | 6                | -0.000005871 | 0.000004358  | -0.000002032 |
| 6                | 1                | 0.000004850  | 0.000000018  | -0.000004473 |
| 7                | 1                | 0.000003674  | -0.000002438 | -0.000002702 |
| 8                | 1                | -0.000004395 | 0.000001316  | 0.000004095  |
| 9                | 1                | -0.000001197 | 0.000004413  | 0.000004412  |
| 10               | 6                | -0.000006124 | -0.000003267 | -0.000003132 |
| 11               | 6                | -0.000002996 | -0.000001334 | -0.000000628 |
| 12               | 6                | 0.000000734  | 0.000009383  | 0.000005127  |
| 13               | 1                | 0.000000202  | -0.000000037 | -0.000004225 |
| 14               | 1                | 0.000002505  | -0.000002717 | 0.000000222  |
| 15               | 8                | 0.000001110  | -0.000001558 | 0.000008905  |
| 16               | 16               | 0.000009471  | -0.000011270 | 0.000013581  |
| 17               | 6                | -0.000005916 | 0.000012749  | -0.000007790 |
| 18               | 7                | 0.000004482  | -0.000008395 | 0.000001500  |
| 19               | 8                | -0.000013109 | -0.000018006 | -0.000008597 |
| 20               | 6                | 0.000014105  | 0.000001540  | 0.000010252  |
| 21               | 1                | -0.000001924 | 0.000000842  | -0.000005819 |
| 22               | 1                | -0.000004484 | -0.000002586 | -0.000001873 |
| 23               | 1                | -0.000006105 | 0.000001174  | -0.000005106 |

**Thiocyanate radical (<sup>•</sup>SCN) in gas phase**

Energy:-491.0146638 a.u. ZPVC:0.007963 a.u. Total energy: -491.0067008 a.u.

| Center<br>Number | Atomic<br>Number | X            | Y            | Z           |
|------------------|------------------|--------------|--------------|-------------|
| 1                | 6                | -0.000075243 | 0.000001306  | 0.000000000 |
| 2                | 7                | 0.000095848  | -0.000000755 | 0.000000000 |
| 3                | 16               | -0.000020605 | -0.000000551 | 0.000000000 |

**C<sub>6</sub>H<sub>4</sub>COCH<sub>2</sub><sup>•</sup> in gas phase**

Energy:-384.251522 a.u. ZPVC:0.124577 a.u. Total energy: -384.126945 a.u.

| Center<br>Number | Atomic<br>Number | X            | Y            | Z            |
|------------------|------------------|--------------|--------------|--------------|
| 1                | 6                | 0.000004079  | 0.000006456  | -0.000004022 |
| 2                | 6                | -0.000000853 | 0.000000469  | 0.000012595  |
| 3                | 6                | 0.000003666  | -0.000031572 | 0.000028381  |
| 4                | 6                | -0.000000861 | 0.000000860  | 0.000001721  |
| 5                | 6                | 0.000008510  | -0.000006850 | 0.000002487  |
| 6                | 1                | -0.000000319 | 0.000001190  | 0.000006551  |
| 7                | 1                | -0.000001465 | -0.000002214 | -0.000003705 |
| 8                | 1                | -0.000032387 | -0.000010224 | -0.000030468 |
| 9                | 1                | -0.000007800 | 0.000003196  | 0.000003265  |
| 10               | 1                | -0.000001742 | 0.000004932  | 0.000003749  |

|    |   |              |              |              |
|----|---|--------------|--------------|--------------|
| 11 | 6 | -0.000009838 | -0.000141482 | 0.000049654  |
| 12 | 6 | 0.000013717  | 0.000085855  | -0.000013731 |
| 13 | 6 | 0.000014045  | 0.000072770  | -0.000025042 |
| 14 | 1 | -0.000003229 | -0.000032800 | 0.000000127  |
| 15 | 1 | 0.000000481  | 0.000007889  | -0.000003804 |
| 16 | 8 | 0.000013996  | 0.000041525  | -0.000027758 |

**CH<sub>3</sub>C<sub>6</sub>H<sub>4</sub>COCH<sub>2</sub> in gas phase**

Energy:-423.570720 a.u. ZPVC:0.151935 a.u. Total energy: -423.418785 a.u.

| Center Number | Atomic Number | X            | Y            | Z            |
|---------------|---------------|--------------|--------------|--------------|
| 1             | 6             | -0.000001254 | 0.000000071  | 0.000001050  |
| 2             | 6             | 0.000001746  | 0.000000793  | 0.000000628  |
| 3             | 6             | 0.000001235  | -0.000000912 | -0.000001004 |
| 4             | 6             | 0.000000149  | 0.000000778  | 0.000000981  |
| 5             | 6             | -0.000001249 | -0.000002091 | 0.000002276  |
| 6             | 1             | 0.000001696  | 0.000000399  | 0.000000132  |
| 7             | 1             | 0.000001709  | 0.000001281  | -0.000002527 |
| 8             | 1             | -0.000002303 | -0.000000933 | 0.000000628  |
| 9             | 1             | -0.000002107 | -0.000001110 | 0.000003356  |
| 10            | 6             | 0.000000210  | -0.000000820 | -0.000002458 |
| 11            | 6             | -0.000002263 | 0.000000468  | -0.000002176 |
| 12            | 6             | 0.000001486  | 0.000001568  | -0.000003807 |
| 13            | 1             | 0.000000817  | 0.000001250  | -0.000005380 |
| 14            | 1             | 0.000002027  | 0.000001438  | -0.000004562 |
| 15            | 8             | -0.000001642 | 0.000000881  | -0.000002857 |
| 16            | 6             | 0.000000242  | -0.000000619 | 0.000003639  |
| 17            | 1             | 0.000000774  | -0.000000568 | 0.000003282  |
| 18            | 1             | 0.000000358  | -0.000000764 | 0.000005048  |
| 19            | 1             | -0.000001629 | -0.000001111 | 0.000003752  |

**CH<sub>3</sub>OC<sub>6</sub>H<sub>4</sub>COCH<sub>2</sub> in gas phase**

Energy:-498.780122 a.u. ZPVC:0.157157 a.u. Total energy: -498.622965 a.u.

| Center Number | Atomic Number | X            | Y            | Z            |
|---------------|---------------|--------------|--------------|--------------|
| 1             | 6             | 0.000015320  | 0.000019170  | 0.000022786  |
| 2             | 6             | -0.000015287 | -0.000021635 | -0.000019125 |
| 3             | 6             | 0.000013597  | 0.000007771  | 0.000001137  |
| 4             | 6             | 0.000014568  | 0.000002285  | 0.000015192  |
| 5             | 6             | -0.000019714 | 0.000008062  | -0.000017432 |
| 6             | 1             | 0.000007492  | 0.000003066  | -0.000003206 |
| 7             | 1             | 0.000000745  | -0.000006459 | -0.000004294 |
| 8             | 1             | -0.000009573 | -0.000003896 | 0.000001744  |
| 9             | 1             | 0.000000757  | 0.000000706  | 0.000008404  |
| 10            | 6             | -0.000005200 | -0.000027010 | 0.000005413  |
| 11            | 6             | 0.000000334  | 0.000014243  | 0.000006065  |
| 12            | 6             | 0.000012637  | 0.000005423  | -0.000012344 |
| 13            | 1             | -0.000001342 | -0.000004553 | -0.000002252 |
| 14            | 1             | 0.000001443  | -0.000003814 | 0.000011295  |
| 15            | 8             | -0.000007402 | 0.000014416  | -0.000001169 |
| 16            | 8             | -0.000002828 | -0.000017765 | -0.000015424 |
| 17            | 6             | 0.000000443  | 0.000006472  | 0.000004677  |

|    |   |              |              |              |
|----|---|--------------|--------------|--------------|
| 18 | 1 | 0.000000159  | 0.000002203  | -0.000000604 |
| 19 | 1 | -0.000001412 | -0.000000390 | 0.000001433  |
| 20 | 1 | -0.000004737 | 0.000001704  | -0.000002297 |

**Phenacylselenocyanate (2a) in gas phase**

Energy:-2878.680517 a.u. ZPVC:0.137028 a.u. Total energy: -2878.543489 a.u.

| Center Number | Atomic Number | X            | Y            | Z            |
|---------------|---------------|--------------|--------------|--------------|
| 1             | 6             | -0.000000062 | -0.000001230 | 0.000004437  |
| 2             | 6             | -0.000004042 | -0.000000968 | 0.000002987  |
| 3             | 6             | -0.000001553 | 0.000003488  | 0.000000392  |
| 4             | 6             | -0.000001652 | -0.000004726 | -0.000001069 |
| 5             | 6             | -0.000000105 | 0.000004404  | -0.000000154 |
| 6             | 1             | -0.000002857 | 0.000000672  | 0.000004388  |
| 7             | 1             | -0.000002587 | 0.000001297  | 0.000006187  |
| 8             | 1             | -0.000000601 | 0.000000090  | 0.000003721  |
| 9             | 1             | 0.000001334  | -0.000000622 | -0.000003576 |
| 10            | 1             | -0.000000345 | 0.000000137  | 0.000000134  |
| 11            | 6             | -0.000000715 | -0.000004755 | -0.000003909 |
| 12            | 6             | 0.000000306  | 0.000003349  | 0.000000067  |
| 13            | 6             | 0.000005120  | -0.000000086 | 0.000004023  |
| 14            | 1             | 0.000000471  | -0.000000856 | -0.000000729 |
| 15            | 1             | -0.000000795 | 0.000001625  | -0.000001522 |
| 16            | 8             | 0.000002157  | -0.000002262 | -0.000005508 |
| 17            | 6             | 0.000003412  | -0.000000294 | -0.000001089 |
| 18            | 7             | 0.000000928  | 0.000000100  | -0.000002445 |
| 19            | 34            | 0.000001586  | 0.000000637  | -0.000006336 |

**C<sub>6</sub>H<sub>4</sub>COCH<sub>2</sub>Se' in gas phase**

Energy:-2785.8147225a.u. ZPVC: 0.128000a.u. Total energy:-2785.686723a.u.

| Center Number | Atomic Number | X            | Y            | Z            |
|---------------|---------------|--------------|--------------|--------------|
| 1             | 6             | 0.000007279  | -0.000003942 | 0.000013540  |
| 2             | 6             | -0.000009763 | -0.000006282 | 0.000003238  |
| 3             | 6             | -0.000002805 | 0.000009252  | -0.000000598 |
| 4             | 6             | -0.000008835 | -0.000019917 | -0.000004419 |
| 5             | 6             | -0.000001514 | 0.000017781  | -0.000001574 |
| 6             | 1             | -0.000000429 | -0.000001083 | 0.000011159  |
| 7             | 1             | -0.000002562 | 0.000000913  | 0.000010301  |
| 8             | 1             | -0.000000558 | 0.000001366  | 0.000004077  |
| 9             | 1             | 0.000000665  | -0.000000249 | -0.000004563 |
| 10            | 1             | 0.000000571  | 0.000000299  | 0.000002473  |
| 11            | 6             | -0.000024871 | 0.000051713  | -0.000022759 |
| 12            | 6             | 0.000002249  | -0.000019942 | -0.000003999 |
| 13            | 6             | 0.000030143  | -0.000051229 | 0.000008219  |
| 14            | 1             | -0.000007230 | 0.000014995  | -0.000006251 |
| 15            | 1             | -0.000015094 | 0.000017335  | -0.000014218 |
| 16            | 8             | 0.000019687  | -0.000034466 | 0.000016356  |
| 17            | 34            | 0.000013067  | 0.000023457  | -0.000010983 |

**Selenocyanate radical (SeCN) in gas phase**

Energy:-2494.353982 a.u. ZPVC:0.007583a.u. Total energy: -2494.346399 a.u.

| Center Number | Atomic Number | X            | Y            | Z            |
|---------------|---------------|--------------|--------------|--------------|
| 1             | 6             | -0.000304265 | -0.000000449 | -0.000000518 |
| 2             | 7             | 0.000282085  | 0.000000268  | 0.000000308  |
| 3             | 34            | 0.000022181  | 0.000000182  | 0.000000210  |

**Cyano radical (CN) in gas phase**

Energy:-92.7171831a.u. ZPVC:0.004901a.u. Total energy: -92.7122821a.u.

| Center Number | Atomic Number | X            | Y           | Z            |
|---------------|---------------|--------------|-------------|--------------|
| 1             | 6             | 0.000001193  | 0.000000000 | -0.000000002 |
| 2             | 7             | -0.000001193 | 0.000000000 | 0.000000002  |

**Phenacylthiocyanate (1a) in DMF**

Energy:-875.358638a.u. ZPVC:0.138322a.u. Total energy: -875.220316 a.u.

| Center Number | Atomic Number | X            | Y            | Z            |
|---------------|---------------|--------------|--------------|--------------|
| 1             | 6             | -0.000005149 | -0.000001412 | 0.000004621  |
| 2             | 6             | 0.000000330  | -0.000000383 | 0.000003767  |
| 3             | 6             | -0.000002422 | 0.000000732  | 0.000003044  |
| 4             | 6             | -0.000004000 | 0.000000587  | 0.000002948  |
| 5             | 6             | -0.000005719 | 0.000000036  | 0.000003889  |
| 6             | 1             | -0.000004564 | 0.000000599  | 0.000007082  |
| 7             | 1             | -0.000001080 | 0.000000995  | 0.000003834  |
| 8             | 1             | 0.000001168  | -0.000000301 | 0.000000065  |
| 9             | 1             | -0.000002815 | 0.000000169  | 0.000002347  |
| 10            | 1             | -0.000004983 | 0.000000329  | 0.000006501  |
| 11            | 6             | -0.000002866 | 0.000012576  | -0.000001006 |
| 12            | 6             | 0.000004485  | -0.000002613 | 0.000001578  |
| 13            | 6             | 0.000009212  | -0.000000159 | -0.000011917 |
| 14            | 1             | 0.000000887  | -0.000000946 | -0.000000139 |
| 15            | 1             | 0.000001521  | -0.000000115 | -0.000001376 |
| 16            | 8             | 0.000001719  | -0.000006561 | 0.000000745  |
| 17            | 16            | -0.000008540 | -0.000001140 | -0.000014348 |
| 18            | 6             | 0.000019590  | -0.000001636 | 0.000001017  |
| 19            | 7             | 0.000003227  | -0.000000758 | -0.000012652 |

**p-Methylphenacylthiocyanate (1b) in DMF**

Energy:-914.6778458a.u. ZPVC:0.165669 a.u. Total energy:-914.5121768a.u.

| Center Number | Atomic Number | X            | Y            | Z            |
|---------------|---------------|--------------|--------------|--------------|
| 1             | 6             | -0.000001517 | -0.000002060 | 0.000001761  |
| 2             | 6             | 0.000003343  | 0.000000888  | -0.000001892 |
| 3             | 6             | -0.000004470 | 0.000000184  | 0.000002927  |
| 4             | 6             | -0.000004654 | -0.000001653 | 0.000003431  |

|    |    |              |              |              |
|----|----|--------------|--------------|--------------|
| 5  | 6  | -0.000001041 | -0.000000299 | 0.000002420  |
| 6  | 1  | 0.000002223  | 0.000000314  | 0.000001194  |
| 7  | 1  | 0.000001026  | 0.000000355  | 0.000000560  |
| 8  | 1  | -0.000002738 | -0.000000519 | 0.000001573  |
| 9  | 1  | -0.000002756 | -0.000001433 | 0.000003243  |
| 10 | 6  | 0.000054927  | 0.000005579  | -0.000087207 |
| 11 | 6  | -0.000010317 | -0.000000702 | 0.000025037  |
| 12 | 6  | -0.000017491 | 0.000006585  | 0.000020020  |
| 13 | 1  | -0.000003555 | -0.000000226 | -0.000005093 |
| 14 | 1  | 0.000007157  | -0.000000385 | 0.000001985  |
| 15 | 8  | -0.000019564 | -0.000004065 | 0.000031163  |
| 16 | 16 | -0.000016340 | -0.000001556 | -0.000014329 |
| 17 | 6  | 0.000021277  | 0.000000747  | 0.000007145  |
| 18 | 7  | -0.000003065 | 0.000002059  | -0.000011330 |
| 19 | 6  | -0.000002130 | -0.000000456 | 0.000005074  |
| 20 | 1  | 0.000000039  | -0.000000610 | 0.000003954  |
| 21 | 1  | 0.000000085  | -0.000000986 | 0.000004233  |
| 22 | 1  | -0.000000438 | -0.000001759 | 0.000004131  |

***p*-Methoxyphenacylthiocyanate (1c) in DMF**

Energy: -989.888932a.u. ZPVC: 0.170890 a.u. Total energy: -989.718042 a.u.

| Center Number | Atomic Number | X            | Y            | Z            |
|---------------|---------------|--------------|--------------|--------------|
| 1             | 6             | -0.000000334 | -0.000000343 | -0.000002515 |
| 2             | 6             | 0.000003703  | 0.000001080  | -0.000001769 |
| 3             | 6             | 0.000001609  | -0.000002806 | -0.000004679 |
| 4             | 6             | -0.000000339 | -0.000000626 | -0.000000653 |
| 5             | 6             | -0.000001496 | 0.000001204  | -0.000000269 |
| 6             | 1             | 0.000004045  | -0.000000981 | -0.000004599 |
| 7             | 1             | 0.000002941  | -0.000001423 | -0.000001110 |
| 8             | 1             | -0.000004372 | 0.000001669  | 0.000003562  |
| 9             | 1             | -0.000001999 | 0.000000637  | 0.000000558  |
| 10            | 6             | -0.000004167 | 0.000015806  | -0.000003609 |
| 11            | 6             | 0.000001066  | -0.000000537 | 0.000007325  |
| 12            | 6             | -0.000000011 | 0.000002695  | 0.000000777  |
| 13            | 1             | -0.000000768 | -0.000000764 | 0.000001574  |
| 14            | 1             | 0.000001574  | -0.000003837 | 0.000003615  |
| 15            | 8             | -0.000003811 | -0.000007386 | 0.000010641  |
| 16            | 16            | -0.000013938 | -0.000003723 | -0.000007316 |
| 17            | 6             | 0.000011972  | -0.000001561 | 0.000018683  |
| 18            | 7             | -0.000004145 | -0.000001300 | -0.000001778 |
| 19            | 8             | 0.000000224  | -0.000001636 | -0.000006680 |
| 20            | 6             | 0.000004352  | 0.000001514  | -0.000001008 |
| 21            | 1             | 0.000003134  | 0.000000471  | -0.000005190 |
| 22            | 1             | 0.000001080  | -0.000000868 | -0.000001713 |
| 23            | 1             | -0.000000318 | 0.000002715  | -0.000003848 |

***p*-Cyanophenacylthiocyanate (1d) in DMF**

Energy: -967.6033244a.u. ZPVC: 0.136700 a.u. Total energy: -967.4666244 a.u.

| Center Number | Atomic Number | X            | Y            | Z           |
|---------------|---------------|--------------|--------------|-------------|
| 1             | 6             | -0.000003232 | -0.000000961 | 0.000003818 |
| 2             | 6             | 0.000000375  | 0.000002004  | 0.000002049 |
| 3             | 6             | -0.000003931 | -0.000001081 | 0.000002445 |
| 4             | 6             | -0.000003793 | -0.000001142 | 0.000002865 |
| 5             | 6             | -0.000002908 | -0.000000196 | 0.000004560 |



|    |    |              |              |              |
|----|----|--------------|--------------|--------------|
| 6  | 1  | -0.000000916 | 0.000000782  | 0.000004218  |
| 7  | 1  | 0.000000196  | 0.000000213  | 0.000001150  |
| 8  | 1  | -0.000002726 | -0.000000030 | 0.000002281  |
| 9  | 1  | -0.000005049 | 0.000000175  | 0.000006341  |
| 10 | 6  | 0.000030758  | 0.000006328  | -0.000047382 |
| 11 | 6  | -0.000004944 | -0.000000646 | 0.000014685  |
| 12 | 6  | 0.000000429  | 0.000001667  | -0.000004187 |
| 13 | 1  | -0.000001205 | -0.000001218 | -0.000000449 |
| 14 | 1  | 0.000003029  | 0.000000098  | 0.000002662  |
| 15 | 8  | -0.000010650 | -0.000004207 | 0.000017851  |
| 16 | 16 | -0.000010993 | -0.000000699 | -0.000019642 |
| 17 | 6  | 0.000024996  | -0.000002405 | 0.000004317  |
| 18 | 7  | 0.000002082  | 0.000000183  | -0.000015453 |
| 19 | 6  | -0.000007554 | -0.000000358 | 0.000007736  |
| 20 | 7  | -0.000003966 | 0.000001495  | 0.000010135  |

***p*-Nitrophenacylthiocyanate (1e) in DMF**

Energy: -1079.8659199a.u. ZPVC:0.140411 a.u. Total energy: -1079.725509 a.u.

| Center Number | Atomic Number | X            | Y            | Z            |
|---------------|---------------|--------------|--------------|--------------|
| 1             | 6             | -0.000007497 | -0.000005636 | 0.000003704  |
| 2             | 6             | 0.000003160  | 0.000001215  | 0.000000926  |
| 3             | 6             | -0.000003419 | -0.000002164 | 0.000003458  |
| 4             | 6             | -0.000006872 | 0.000000882  | 0.000003462  |
| 5             | 6             | -0.000002950 | 0.000001634  | 0.000002334  |
| 6             | 1             | 0.000000022  | -0.000000378 | 0.000002677  |
| 7             | 1             | 0.000000696  | -0.000000210 | 0.000001245  |
| 8             | 1             | -0.000003850 | 0.000000652  | 0.000002855  |
| 9             | 1             | -0.000006399 | 0.000000758  | 0.000005914  |
| 10            | 6             | 0.000087604  | 0.000002148  | -0.000119376 |
| 11            | 6             | -0.000018433 | 0.000003185  | 0.000036925  |
| 12            | 6             | -0.000022231 | 0.000001576  | 0.000026053  |
| 13            | 1             | -0.000003724 | -0.000000092 | -0.000004912 |
| 14            | 1             | 0.000011665  | 0.000000585  | 0.000004185  |
| 15            | 8             | -0.000026499 | 0.000000199  | 0.000040576  |
| 16            | 16            | -0.000027073 | -0.000001082 | -0.000022028 |
| 17            | 6             | 0.000040173  | -0.000005969 | 0.000007772  |
| 18            | 7             | -0.000000775 | -0.000001815 | -0.000017377 |
| 19            | 7             | -0.000005566 | -0.000007212 | 0.000001872  |
| 20            | 8             | -0.000005803 | 0.000006325  | 0.000010356  |
| 21            | 8             | -0.000002227 | 0.000005399  | 0.000009377  |

**Phenacylselenocyanate (2a) in DMF**

Energy: -2878.693797 a.u. ZPVC:0.137099 a.u. Total energy: -2878.830896 a.u.

| Center Number | Atomic Number | X            | Y            | Z            |
|---------------|---------------|--------------|--------------|--------------|
| 1             | 6             | -0.000001592 | -0.000006551 | 0.000011304  |
| 2             | 6             | -0.000009572 | -0.000004306 | 0.000005754  |
| 3             | 6             | 0.000001077  | -0.000009242 | 0.000009258  |
| 4             | 6             | -0.000008944 | 0.000004141  | -0.000008288 |
| 5             | 6             | -0.000005304 | 0.000004274  | 0.000003014  |
| 6             | 1             | -0.000005202 | 0.000002040  | 0.000011483  |
| 7             | 1             | -0.000009114 | -0.000003923 | 0.000009018  |
| 8             | 1             | -0.000004171 | 0.000000526  | -0.000000920 |
| 9             | 1             | 0.000006189  | -0.000002808 | 0.000000435  |
| 10            | 1             | -0.000003561 | 0.000000726  | 0.000003501  |

|    |    |              |              |              |
|----|----|--------------|--------------|--------------|
| 11 | 6  | -0.000042914 | -0.000004737 | 0.000064801  |
| 12 | 6  | 0.000005494  | 0.000005365  | -0.000025304 |
| 13 | 6  | 0.000014130  | 0.000007085  | -0.000045089 |
| 14 | 1  | 0.000019963  | 0.000004968  | 0.000007687  |
| 15 | 1  | 0.000004094  | 0.000011580  | 0.000006527  |
| 16 | 8  | -0.000004013 | 0.000028890  | -0.000048703 |
| 17 | 6  | 0.000001740  | 0.000016416  | -0.000020967 |
| 18 | 7  | 0.000064334  | -0.000008304 | 0.000043456  |
| 19 | 34 | -0.000022636 | -0.000046142 | -0.000026966 |

***p*-Methylphenacylselenocyanate (2b) in DMF**

Energy:-2918.0130114a.u. ZPVC:0.164408 a.u. Total energy: -2917.848603 a.u.

| Center Number | Atomic Number | X            | Y            | Z            |
|---------------|---------------|--------------|--------------|--------------|
| 1             | 6             | 0.000003629  | -0.000002621 | 0.000007775  |
| 2             | 6             | -0.000006024 | -0.000010410 | 0.000001019  |
| 3             | 6             | -0.000001087 | -0.000000512 | 0.000005617  |
| 4             | 6             | -0.000003120 | 0.000005450  | -0.000001361 |
| 5             | 6             | -0.000002629 | -0.000004486 | -0.000002065 |
| 6             | 1             | -0.000002755 | -0.000001885 | 0.000004416  |
| 7             | 1             | -0.000003234 | -0.000000152 | 0.000000224  |
| 8             | 1             | 0.000002986  | -0.000003351 | -0.000001760 |
| 9             | 1             | 0.000000438  | 0.000000064  | 0.000000970  |
| 10            | 6             | 0.000026173  | 0.000010061  | -0.000026428 |
| 11            | 6             | -0.000010947 | -0.000003816 | 0.000000663  |
| 12            | 6             | -0.000006630 | -0.000021003 | -0.000007487 |
| 13            | 1             | 0.000011090  | 0.000015298  | 0.000000285  |
| 14            | 1             | 0.000004101  | 0.000019599  | 0.000007753  |
| 15            | 8             | -0.000016349 | 0.000018965  | -0.000004385 |
| 16            | 6             | 0.000008257  | 0.000002140  | -0.000005139 |
| 17            | 7             | 0.000036097  | -0.000002753 | 0.000020836  |
| 18            | 6             | -0.000002443 | -0.000002378 | 0.000005284  |
| 19            | 1             | -0.000004004 | -0.000000283 | 0.000006659  |
| 20            | 1             | -0.000003304 | 0.000001715  | 0.000006213  |
| 21            | 1             | -0.000003364 | -0.000000909 | 0.000005783  |
| 22            | 34            | -0.000026882 | -0.000018733 | -0.000024873 |

***p*-Methoxyphenacylselenocyanate (2c) in DMF**

Energy:-2993.2241333a.u. ZPVC:0.169615 a.u. Total energy: -2993.054518 a.u.

| Center Number | Atomic Number | X            | Y            | Z            |
|---------------|---------------|--------------|--------------|--------------|
| 1             | 6             | -0.000002525 | -0.000001549 | -0.000004306 |
| 2             | 6             | -0.000006107 | -0.000013884 | -0.000006939 |
| 3             | 6             | 0.000004693  | 0.000001919  | 0.000000762  |
| 4             | 6             | -0.000001941 | 0.000008969  | 0.000001393  |
| 5             | 6             | 0.000001072  | -0.000019989 | -0.000001928 |
| 6             | 1             | 0.000000549  | -0.000002605 | -0.000001308 |
| 7             | 1             | -0.000001648 | -0.000001260 | 0.000000647  |
| 8             | 1             | 0.000001455  | -0.000003394 | 0.000001188  |
| 9             | 1             | -0.000006348 | -0.000005318 | -0.000005576 |
| 10            | 6             | 0.000024956  | 0.000010804  | -0.000009806 |
| 11            | 6             | -0.000018962 | -0.000013416 | -0.000000770 |
| 12            | 6             | -0.000008532 | -0.000019966 | -0.000006707 |
| 13            | 1             | 0.000004704  | 0.000014188  | 0.000010726  |
| 14            | 1             | -0.000001304 | 0.000007638  | 0.000010754  |

|    |    |              |              |              |
|----|----|--------------|--------------|--------------|
| 15 | 8  | -0.000023513 | 0.000009977  | -0.000011264 |
| 16 | 6  | 0.000003323  | 0.000022543  | 0.000001565  |
| 17 | 7  | 0.000031725  | -0.000008972 | 0.000044090  |
| 18 | 8  | -0.000006106 | -0.000000228 | -0.000008933 |
| 19 | 6  | 0.000017463  | 0.000018200  | 0.000010542  |
| 20 | 1  | 0.000002530  | 0.000000281  | -0.000004186 |
| 21 | 1  | -0.000000710 | 0.000004192  | -0.000004823 |
| 22 | 1  | 0.000002844  | 0.000007404  | -0.000006567 |
| 23 | 34 | -0.000017617 | -0.000015536 | -0.000008554 |

***p*-Cyanophenacylselenocyanate (2d) in DMF**

Energy:-2970.9384605 a.u. ZPVC:0.135489 a.u. Total energy: -2970.802972 a.u.

| Center Number | Atomic Number | X            | Y            | Z            |
|---------------|---------------|--------------|--------------|--------------|
| 1             | 6             | -0.000010912 | 0.000005844  | -0.000000442 |
| 2             | 6             | -0.000003903 | 0.000000039  | 0.000006481  |
| 3             | 6             | -0.000002012 | -0.000002291 | 0.000003238  |
| 4             | 6             | -0.000002649 | -0.000002140 | -0.000003060 |
| 5             | 6             | -0.000000143 | 0.000006221  | 0.000003205  |
| 6             | 1             | -0.000007983 | 0.000000752  | 0.000006871  |
| 7             | 1             | -0.000002345 | 0.000000680  | 0.000001489  |
| 8             | 1             | 0.000003521  | 0.000001289  | -0.000002168 |
| 9             | 1             | -0.000002453 | 0.000001107  | 0.000002391  |
| 10            | 6             | -0.000001649 | -0.000009706 | -0.000006619 |
| 11            | 6             | 0.000002251  | 0.000002452  | 0.000000525  |
| 12            | 6             | 0.000005930  | 0.000012324  | -0.000010824 |
| 13            | 1             | -0.000001891 | -0.000010140 | -0.000000153 |
| 14            | 1             | 0.000000805  | -0.000003778 | -0.000004166 |
| 15            | 8             | 0.000009888  | 0.000000829  | 0.000000804  |
| 16            | 6             | -0.000002636 | 0.000002126  | -0.000006473 |
| 17            | 7             | 0.000015294  | -0.000003831 | -0.000006040 |
| 18            | 6             | 0.000001070  | -0.000003266 | 0.000016362  |
| 19            | 7             | -0.000013970 | 0.000005510  | 0.000007016  |
| 20            | 34            | 0.000013787  | -0.000004018 | -0.000008436 |

***p*-Nitrophenacylselenocyanate (2e) in DMF**

Energy:-3083.2010531 a.u. ZPVC:0.139207 a.u. Total energy: -3083.061846 a.u.

| Center Number | Atomic Number | X            | Y            | Z            |
|---------------|---------------|--------------|--------------|--------------|
| 1             | 6             | -0.000004272 | -0.000000939 | 0.000005143  |
| 2             | 6             | -0.000002048 | -0.000000292 | 0.000003322  |
| 3             | 6             | -0.000002868 | -0.000002957 | 0.000004188  |
| 4             | 6             | -0.000002576 | 0.000000373  | -0.000000011 |
| 5             | 6             | 0.000000489  | 0.000005167  | 0.000001448  |
| 6             | 1             | -0.000005949 | -0.000000026 | 0.000004103  |
| 7             | 1             | -0.000003331 | -0.000001037 | 0.000000451  |
| 8             | 1             | 0.000001828  | 0.000001575  | -0.000001556 |
| 9             | 1             | -0.000002654 | 0.000003187  | 0.000001971  |
| 10            | 6             | 0.000038465  | 0.000005650  | -0.000056125 |
| 11            | 6             | -0.000009692 | -0.000002294 | 0.000013860  |
| 12            | 6             | -0.000004945 | 0.000003247  | 0.000003711  |
| 13            | 1             | 0.000001294  | -0.000000402 | -0.000002624 |
| 14            | 1             | 0.000004579  | 0.000004994  | 0.000003225  |
| 15            | 8             | -0.000003126 | 0.000001237  | 0.000017617  |
| 16            | 6             | 0.000003009  | -0.000007296 | -0.000012766 |
| 17            | 7             | 0.000017698  | -0.000003722 | 0.000001284  |

|    |    |              |              |              |
|----|----|--------------|--------------|--------------|
| 18 | 7  | -0.000003047 | 0.000005055  | 0.000004175  |
| 19 | 8  | -0.000010084 | 0.000003419  | 0.000006350  |
| 20 | 8  | -0.000009161 | 0.000001483  | 0.000007362  |
| 21 | 34 | -0.000003610 | -0.000016422 | -0.000005129 |

**Reduced phenacylthiocyanate (1a + e<sup>-</sup>) in DMF**

Energy:-875.4858897 a.u. ZPVC:0.134163 a.u. Total energy: -875.3517267 a.u.

| Center Number | Atomic Number | X            | Y            | Z            |
|---------------|---------------|--------------|--------------|--------------|
| 1             | 6             | -0.000010096 | 0.000001819  | -0.000008668 |
| 2             | 6             | 0.000006842  | 0.000008999  | 0.000004049  |
| 3             | 6             | -0.000000918 | -0.000011242 | 0.000008102  |
| 4             | 6             | 0.000008409  | 0.000007787  | -0.000002490 |
| 5             | 6             | -0.000000756 | -0.000010557 | 0.000001646  |
| 6             | 1             | -0.000001508 | 0.000001026  | 0.000000215  |
| 7             | 1             | -0.000005499 | 0.000000395  | 0.000002282  |
| 8             | 1             | -0.000001298 | 0.000001758  | 0.000002878  |
| 9             | 1             | 0.000004299  | -0.000001980 | -0.000005272 |
| 10            | 1             | 0.000002627  | 0.000002103  | -0.000005821 |
| 11            | 6             | 0.000000662  | -0.000012595 | 0.000003149  |
| 12            | 6             | -0.000000339 | 0.000008623  | -0.000007641 |
| 13            | 6             | 0.000008048  | 0.000003834  | -0.000000484 |
| 14            | 1             | 0.000003394  | -0.000003078 | 0.000002009  |
| 15            | 1             | -0.000001624 | -0.000003366 | 0.000005483  |
| 16            | 8             | 0.000002972  | 0.000003868  | -0.000007776 |
| 17            | 16            | -0.000000896 | -0.000002010 | 0.000000390  |
| 18            | 6             | -0.000007648 | 0.000003262  | 0.000001436  |
| 19            | 7             | -0.000006672 | 0.000001353  | 0.000006512  |

**Reduced *p*-methylphenacylthiocyanate (1b + e<sup>-</sup>) in DMF**

Energy:-914.8043289 a.u. ZPVC:0.161354 a.u. Total energy: -914.6429749 a.u.

| Center Number | Atomic Number | X            | Y            | Z            |
|---------------|---------------|--------------|--------------|--------------|
| 1             | 6             | -0.000003522 | 0.000002827  | -0.000008531 |
| 2             | 6             | 0.000003308  | 0.000005097  | 0.000006032  |
| 3             | 6             | 0.000002020  | -0.000009129 | 0.000001530  |
| 4             | 6             | 0.000002904  | 0.000004730  | -0.000000074 |
| 5             | 6             | 0.000001833  | -0.000009711 | 0.000000139  |
| 6             | 1             | -0.000000434 | 0.000000738  | 0.000001484  |
| 7             | 1             | -0.000002198 | 0.000001635  | 0.000003581  |
| 8             | 1             | 0.000000202  | -0.000002370 | -0.000001066 |
| 9             | 1             | 0.000002545  | -0.000000754 | -0.000002639 |
| 10            | 6             | -0.000002751 | 0.000001071  | 0.000001591  |
| 11            | 6             | 0.000000462  | 0.000004562  | -0.000007248 |
| 12            | 6             | 0.000001509  | -0.000003070 | -0.000000343 |
| 13            | 1             | -0.000003565 | 0.000002711  | -0.000000834 |
| 14            | 1             | -0.000003176 | 0.000001876  | 0.000000327  |
| 15            | 8             | 0.000008849  | -0.000003342 | 0.000001287  |
| 16            | 16            | -0.000003999 | 0.000000245  | 0.000005827  |
| 17            | 6             | -0.000004710 | 0.000007059  | -0.000008392 |
| 18            | 7             | -0.000006061 | 0.000000886  | 0.000008655  |
| 19            | 6             | 0.000000202  | -0.000003074 | 0.000000238  |
| 20            | 1             | 0.000001282  | -0.000000456 | 0.000000234  |
| 21            | 1             | 0.000002350  | -0.000000130 | -0.000002250 |
| 22            | 1             | 0.000002949  | -0.000001401 | 0.000000453  |

**Reduced *p*-methoxyphenacylthiocyanate (1c + e<sup>-</sup>) in DMF**

Energy: -990.0146738 a.u. ZPVC: 0.166626 a.u. Total energy: -989.8480478 a.u.

| Center Number | Atomic Number | X            | Y            | Z            |
|---------------|---------------|--------------|--------------|--------------|
| 1             | 6             | -0.000003615 | 0.000002616  | -0.000003105 |
| 2             | 6             | 0.000008228  | 0.000006416  | 0.000001974  |
| 3             | 6             | 0.000006815  | -0.000018895 | 0.000005874  |
| 4             | 6             | 0.000001638  | 0.000003200  | 0.000007329  |
| 5             | 6             | 0.000000442  | -0.000008610 | 0.000004554  |
| 6             | 1             | 0.000005885  | 0.000000551  | -0.000005703 |
| 7             | 1             | 0.000004791  | 0.000013087  | -0.000011466 |
| 8             | 1             | -0.000007073 | -0.000004210 | 0.000006325  |
| 9             | 1             | -0.000003057 | -0.000002542 | 0.000005810  |
| 10            | 6             | -0.000000506 | -0.000020394 | 0.000007673  |
| 11            | 6             | -0.000012610 | 0.000010093  | -0.000004873 |
| 12            | 6             | -0.000001579 | -0.000000341 | -0.000002863 |
| 13            | 1             | 0.000002403  | 0.000000452  | 0.000004731  |
| 14            | 1             | -0.000005213 | 0.000002781  | -0.000002908 |
| 15            | 8             | -0.000004408 | 0.000005720  | 0.000004560  |
| 16            | 16            | -0.000007410 | 0.000008927  | -0.000008387 |
| 17            | 6             | -0.000017057 | -0.000001260 | 0.000000225  |
| 18            | 7             | 0.000020918  | 0.000012187  | -0.000017091 |
| 19            | 8             | 0.000003291  | -0.000000760 | -0.000000011 |
| 20            | 6             | 0.000003411  | -0.000002477 | 0.000000584  |
| 21            | 1             | 0.000003857  | -0.000001543 | -0.000000125 |
| 22            | 1             | 0.000002845  | -0.000004249 | 0.000005065  |
| 23            | 1             | -0.000001997 | -0.000000750 | 0.000001829  |

**Reduced *p*-cyanophenacylthiocyanate (1d<sup>-</sup>) in DMF**

Energy: -967.722426a.u. ZPVC: 0.134150 a.u. Total energy: -967.588276 a.u.

| Center Number | Atomic Number | X            | Y            | Z            |
|---------------|---------------|--------------|--------------|--------------|
| 1             | 6             | 0.000000437  | -0.000003437 | 0.000003725  |
| 2             | 6             | 0.000004708  | 0.000007324  | 0.000000848  |
| 3             | 6             | -0.000002554 | -0.000004482 | 0.000000422  |
| 4             | 6             | -0.000000951 | -0.000004499 | 0.000001781  |
| 5             | 6             | -0.000004131 | 0.000002032  | 0.000004719  |
| 6             | 1             | 0.000002978  | -0.000001507 | -0.000003083 |
| 7             | 1             | 0.000006688  | 0.000000822  | -0.000002767 |
| 8             | 1             | -0.000006541 | 0.000003191  | 0.000004186  |
| 9             | 1             | -0.000004996 | 0.000002434  | 0.000006962  |
| 10            | 6             | -0.000001476 | -0.000007536 | 0.000005272  |
| 11            | 6             | 0.000000856  | 0.000011786  | 0.000005001  |
| 12            | 6             | -0.000004989 | -0.000001427 | 0.000001365  |
| 13            | 1             | 0.000005533  | 0.000000571  | -0.000006162 |
| 14            | 1             | 0.000008838  | -0.000006069 | -0.000003444 |
| 15            | 8             | -0.000006132 | 0.000002205  | -0.000003919 |
| 16            | 16            | 0.000004017  | 0.000000302  | -0.000001391 |
| 17            | 6             | -0.000002139 | -0.000001757 | -0.000008240 |
| 18            | 7             | 0.000008032  | -0.000001307 | -0.000006847 |
| 19            | 6             | -0.000010345 | 0.000002117  | -0.000004756 |
| 20            | 7             | 0.000002170  | -0.000000761 | 0.000006329  |

**Reduced *p*-nitrophenacylthiocyanate (1e<sup>-</sup>) in DMF**

Energy:-1080.0089554 a.u. ZPVC:0.138318a.u. Total energy: -1079.870637 a.u.

| Center Number | Atomic Number | X            | Y            | Z            |
|---------------|---------------|--------------|--------------|--------------|
| 1             | 6             | 0.000009159  | 0.000041967  | 0.000000306  |
| 2             | 6             | 0.000023906  | 0.000028214  | 0.000014443  |
| 3             | 6             | -0.000012494 | -0.000021250 | 0.000002171  |
| 4             | 6             | -0.000024223 | -0.000018504 | -0.000017949 |
| 5             | 6             | -0.000003742 | 0.000031791  | -0.000001092 |
| 6             | 1             | 0.000003863  | 0.000004603  | 0.000000785  |
| 7             | 1             | 0.000009334  | 0.000001084  | -0.000000440 |
| 8             | 1             | -0.000002092 | -0.000000470 | 0.000004545  |
| 9             | 1             | -0.000002738 | 0.000003926  | 0.000008206  |
| 10            | 6             | -0.000041826 | 0.000040829  | -0.000016579 |
| 11            | 6             | 0.000034918  | -0.000010662 | 0.000026121  |
| 12            | 6             | 0.000017152  | -0.000007921 | 0.000005571  |
| 13            | 1             | 0.000005513  | -0.000001083 | -0.000004375 |
| 14            | 1             | 0.000004829  | -0.000003854 | -0.000002237 |
| 15            | 8             | 0.000015528  | 0.000004647  | -0.000002160 |
| 16            | 16            | 0.000017285  | -0.000003766 | 0.000013916  |
| 17            | 6             | -0.000017990 | -0.000000428 | -0.000033032 |
| 18            | 7             | 0.000011593  | -0.000000270 | -0.000004281 |
| 19            | 7             | -0.000043654 | -0.000085340 | -0.000003289 |
| 20            | 8             | -0.000011104 | 0.000005939  | -0.000001054 |
| 21            | 8             | 0.000006784  | -0.000009451 | 0.000010423  |

**Reduced phenacylselenocyanate (2a + e<sup>-</sup>) in DMF**

Energy:-2878.8205495a.u. ZPVC:0.133723 a.u. Total energy:-2878.686827a.u.

| Center Number | Atomic Number | X            | Y            | Z            |
|---------------|---------------|--------------|--------------|--------------|
| 1             | 6             | -0.000038939 | 0.000006820  | -0.000001203 |
| 2             | 6             | 0.000013971  | 0.000023512  | 0.000019792  |
| 3             | 6             | 0.000023015  | -0.000029266 | -0.000007372 |
| 4             | 6             | 0.000013943  | 0.000029713  | 0.000014585  |
| 5             | 6             | 0.000022827  | -0.000028559 | -0.000010788 |
| 6             | 1             | 0.000005015  | -0.000001748 | 0.000008779  |
| 7             | 1             | -0.000005982 | -0.000006217 | 0.000001380  |
| 8             | 1             | -0.000005428 | 0.000003896  | 0.000007042  |
| 9             | 1             | 0.000004287  | -0.000002111 | -0.000006538 |
| 10            | 1             | -0.000004894 | 0.000003440  | 0.000004155  |
| 11            | 6             | 0.000008903  | -0.000013292 | -0.000035527 |
| 12            | 6             | -0.000044274 | 0.000020717  | -0.000008676 |
| 13            | 6             | 0.000020860  | -0.000011440 | 0.000050377  |
| 14            | 1             | -0.000007786 | 0.000007613  | -0.000014734 |
| 15            | 1             | -0.000026071 | 0.000009160  | -0.000030999 |
| 16            | 8             | 0.000008968  | -0.000006689 | 0.000010233  |
| 17            | 6             | -0.000017740 | 0.000017072  | -0.000023670 |
| 18            | 7             | -0.000002217 | -0.000001165 | 0.000011205  |
| 19            | 34            | 0.000031541  | -0.000021455 | 0.000011957  |

**Reduced *p*-methylphenacylselenocyanate (2b + e<sup>-</sup>) in DMF**

Energy:-2918.1388616 a.u. ZPVC:0.160995 a.u. Total energy: -2917.977867 a.u.

| Center Number | Atomic Number | X            | Y            | Z            |
|---------------|---------------|--------------|--------------|--------------|
| 1             | 6             | -0.000000649 | 0.000001312  | -0.000000712 |
| 2             | 6             | 0.000000048  | -0.000001201 | -0.000003143 |
| 3             | 6             | -0.000004958 | 0.000007092  | 0.000000977  |
| 4             | 6             | 0.000003453  | -0.000004089 | -0.000003445 |
| 5             | 6             | -0.000000269 | 0.000001034  | 0.000000374  |
| 6             | 1             | -0.000002602 | 0.000000541  | 0.000001204  |
| 7             | 1             | 0.000001115  | -0.000006975 | 0.000002989  |
| 8             | 1             | 0.000001281  | 0.000001133  | -0.000000040 |
| 9             | 1             | -0.000000320 | 0.000001418  | -0.000000746 |
| 10            | 6             | 0.000004367  | -0.000001188 | -0.000001632 |
| 11            | 6             | -0.000003117 | 0.000004502  | 0.000005248  |
| 12            | 6             | -0.000000909 | 0.000001156  | 0.000000463  |
| 13            | 1             | 0.000003260  | 0.000000338  | 0.000001285  |
| 14            | 1             | 0.000003030  | -0.000002722 | -0.000003359 |
| 15            | 8             | 0.000001264  | -0.000000383 | 0.000001069  |
| 16            | 6             | 0.000004236  | -0.000003937 | 0.000005470  |
| 17            | 7             | -0.000004991 | 0.000006028  | -0.000002542 |
| 18            | 6             | -0.000002537 | 0.000001772  | 0.000000772  |
| 19            | 1             | -0.000002994 | 0.000001315  | 0.000000126  |
| 20            | 1             | -0.000002423 | 0.000001781  | -0.000001413 |
| 21            | 1             | -0.000001843 | 0.000000918  | -0.000000385 |
| 22            | 34            | 0.000005560  | -0.000009847 | -0.000002562 |

**Reduced *p*-methoxyphenacylselenocyanate (2c + e<sup>-</sup>) in DMF**

Energy:-2993.3490693 a.u. ZPVC:0.166160 a.u. Total energy: -2993.182909 a.u.

| Center Number | Atomic Number | X            | Y            | Z            |
|---------------|---------------|--------------|--------------|--------------|
| 1             | 6             | -0.000003458 | 0.000002922  | -0.000000836 |
| 2             | 6             | 0.000002955  | 0.000003789  | 0.000002092  |
| 3             | 6             | -0.000000065 | 0.000001689  | -0.000002158 |
| 4             | 6             | -0.000001383 | 0.000002138  | -0.000001838 |
| 5             | 6             | 0.000003995  | -0.000000983 | 0.000005178  |
| 6             | 1             | 0.000000583  | 0.000000323  | 0.000001482  |
| 7             | 1             | -0.000001245 | -0.000000268 | -0.000001550 |
| 8             | 1             | 0.000000698  | -0.000000872 | -0.000000065 |
| 9             | 1             | -0.000000303 | -0.000004848 | -0.000000028 |
| 10            | 6             | 0.000001236  | -0.000004832 | 0.000003163  |
| 11            | 6             | 0.000000579  | -0.000005221 | 0.000001444  |
| 12            | 6             | -0.000008749 | 0.000012708  | -0.000011608 |
| 13            | 1             | 0.000003390  | -0.000000322 | -0.000008069 |
| 14            | 1             | -0.000004428 | 0.000000275  | -0.000002488 |
| 15            | 8             | 0.000003434  | 0.000000609  | 0.000000175  |
| 16            | 6             | 0.000000646  | 0.000001925  | -0.000006701 |
| 17            | 7             | -0.000000180 | 0.000003873  | -0.000000580 |
| 18            | 8             | -0.000005639 | -0.000008100 | 0.000005548  |
| 19            | 6             | 0.000008607  | 0.000003714  | 0.000004470  |
| 20            | 1             | 0.000001270  | -0.000001906 | 0.000004015  |
| 21            | 1             | -0.000000267 | -0.000002374 | 0.000003604  |
| 22            | 1             | -0.000001224 | -0.000002244 | 0.000001958  |
| 23            | 34            | -0.000000453 | -0.000001994 | 0.000002794  |

**Reduced *p*-cyanophenacylselenocyanate (2d<sup>-</sup>) in DMF**

Energy:-2971.0586597 a.u. ZPVC:0.132905 a.u. Total energy:-2970.925755 a.u.

| Center Number | Atomic Number | X            | Y            | Z            |
|---------------|---------------|--------------|--------------|--------------|
| 1             | 6             | -0.000002290 | -0.000005874 | 0.000002400  |
| 2             | 6             | 0.000007046  | 0.000008083  | 0.000000262  |
| 3             | 6             | -0.000001660 | -0.000007984 | -0.000002798 |
| 4             | 6             | -0.000008205 | -0.000007173 | 0.000003688  |
| 5             | 6             | -0.000002918 | 0.000004586  | 0.000006495  |
| 6             | 1             | 0.000004722  | -0.000002231 | -0.000004619 |
| 7             | 1             | 0.000007210  | 0.000000852  | -0.000003596 |
| 8             | 1             | -0.000008388 | 0.000003457  | 0.000007321  |
| 9             | 1             | -0.000006301 | 0.000001671  | 0.000009397  |
| 10            | 6             | 0.000007794  | 0.000017739  | -0.000001496 |
| 11            | 6             | -0.000001899 | -0.000007814 | 0.000005765  |
| 12            | 6             | -0.000002969 | -0.000003380 | 0.000000244  |
| 13            | 1             | 0.000001868  | 0.000002971  | -0.000007857 |
| 14            | 1             | 0.000007821  | -0.000001882 | -0.000003208 |
| 15            | 8             | -0.000007789 | 0.000002269  | 0.000003158  |
| 16            | 6             | -0.000002670 | -0.000000779 | -0.000010061 |
| 17            | 7             | 0.000007583  | -0.000000092 | -0.000010800 |
| 18            | 6             | -0.000007190 | -0.000002125 | -0.000001870 |
| 19            | 7             | 0.000002923  | 0.000000284  | 0.000005486  |
| 20            | 34            | 0.000005314  | -0.000002578 | 0.000002092  |

**Reduced *p*-nitrophenacylselenocyanate (2e<sup>-</sup>) in DMF**

Energy:-3083.3444004 a.u. ZPVC:0.137080 a.u. Total energy: -3083.20732 a.u.

| Center Number | Atomic Number | X            | Y            | Z            |
|---------------|---------------|--------------|--------------|--------------|
| 1             | 6             | -0.000002095 | 0.000005185  | 0.000002342  |
| 2             | 6             | -0.000001167 | 0.000000301  | 0.000001325  |
| 3             | 6             | -0.000000327 | -0.000001133 | -0.000001469 |
| 4             | 6             | -0.000003449 | -0.000000893 | 0.000000986  |
| 5             | 6             | -0.000002623 | -0.000000642 | 0.000002415  |
| 6             | 1             | 0.000000663  | -0.000000238 | 0.000001459  |
| 7             | 1             | 0.000001139  | -0.000001454 | -0.000001034 |
| 8             | 1             | -0.000002377 | 0.000000723  | 0.000002031  |
| 9             | 1             | -0.000004005 | 0.000001846  | 0.000003992  |
| 10            | 6             | -0.000016546 | 0.000024618  | -0.000017527 |
| 11            | 6             | 0.000007893  | -0.000003941 | 0.000007675  |
| 12            | 6             | 0.000003791  | -0.000007027 | 0.000002179  |
| 13            | 1             | 0.000001429  | 0.000000188  | -0.000004541 |
| 14            | 1             | 0.000004005  | 0.000000140  | -0.000003107 |
| 15            | 8             | 0.000007912  | -0.000015634 | 0.000007068  |
| 16            | 6             | 0.000000608  | 0.000002726  | -0.000009621 |
| 17            | 7             | 0.000006429  | -0.000002469 | -0.000005917 |
| 18            | 7             | -0.000001946 | -0.000002345 | 0.000002612  |
| 19            | 8             | -0.000008493 | 0.000003356  | 0.000002342  |
| 20            | 8             | 0.000001028  | -0.000002522 | 0.000007134  |
| 21            | 34            | 0.000008132  | -0.000000784 | -0.000000342 |

Reference



1. G. W. T. M. J. Frisch, H. B. Schlegel, G. E. Scuseria, M. A. Robb, J. R. Cheeseman,, V. B. G. Scalmani, B. Mennucci, G. A. Petersson, H. Nakatsuji, M. Caricato, X. Li, H. P. Hratchian, A. F. Izmaylov, J. Bloino, G. Zheng, J. L. Sonnenberg, M. Hada, M. Ehara, K. Toyota, R. Fukuda, J. Hasegawa, M. Ishida, T. Nakajima, Y. Honda, O. Kitao, H. Nakai, T. Vreven, J. A. Montgomery, Jr., J. E. Peralta, F. Ogliaro, M. Bearpark, J. J. Heyd, E. Brothers, K. N. Kudin, V. N. Staroverov, T. Keith, R. Kobayashi, J. Normand, K. Raghavachari, A. Rendell, J. C. Burant, S. S. Iyengar, J. Tomasi, M. Cossi, N. Rega, J. M. Millam, M. Klene, J. E. Knox, J. B. Cross, V. Bakken, C. Adamo, J. Jaramillo, R. Gomperts, R. E. Stratmann, O. and A. J. A. Yazyev, R. Cammi, C. Pomelli, J. W. Ochterski, R. L. Martin, K. Morokuma, V. G. Zakrzewski, G. A. Voth, P. Salvador, J. J. Dannenberg, S. Dapprich, A. D. Daniels, O. Farkas, J. B. Foresman, J. V. Ortiz, J. Cioslowski, and D. J. Fox, *Gaussian 09, Revision D.01*, Gaussian, Inc., Wallingford CT, 2013.
